# Supplementary material for: Airborne remote sensing and in situ measurements of atmospheric CO 2 to quantify point source emissions
Source: Copernicus journal article supplement (doi:10.5194/amt-11-721-2018), 2018-02-07
Supplement: Supplementary file 1 [file amt-11-721-2018-supplement.pdf]

Supplement of Atmos. Meas. Tech., 11, 721–739, 2018  
<https://doi.org/10.5194/amt-11-721-2018-supplement>  
© Author(s) 2018. This work is distributed under  
the Creative Commons Attribution 3.0 License.

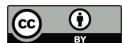

*Supplement of*

## **Airborne remote sensing and in situ measurements of atmospheric CO<sub>2</sub> to quantify point source emissions**

**Thomas Krings et al.**

*Correspondence to:* Thomas Krings ([thomas.krings@iup.physik.uni-bremen.de](mailto:thomas.krings@iup.physik.uni-bremen.de))

The copyright of individual parts of the supplement might differ from the CC BY 3.0 License.

## Details about the in-situ fluxes from a variety of methods; using the variations for error estimates

| day_source                               | S4: Fimmersdorf | S3: Neurath_old | S2: Neurath_new | S1: Niederaussem | percentage measured<br>(rest was extrapolated) | different variations of our linear method |        |           |              |           |           | average | minima | maxima | relative error estimate | by Kriging |           | extreme to unrealistic assumptions |              |                | remarks |                                  |             |
|------------------------------------------|-----------------|-----------------|-----------------|------------------|------------------------------------------------|-------------------------------------------|--------|-----------|--------------|-----------|-----------|---------|--------|--------|-------------------------|------------|-----------|------------------------------------|--------------|----------------|---------|----------------------------------|-------------|
|                                          |                 |                 |                 |                  |                                                | 200 x 100 fb                              | flux 2 | 200 x 100 | 200 x 100 lb | 100 x 100 | 200 x 200 |         |        |        |                         | Kriging    | Kriging 2 | 200 x 100 ce                       | bulk average | bulk average 2 |         |                                  |             |
| 15_RWE_cluster_total                     | X               | X               | X               | X                | 86%                                            | Mt/a                                      | Mt/a   | Mt/a      | Mt/a         | Mt/a      | Mt/a      | Mt/a    | Mt/a   | Mt/a   | Mt/a                    | Mt/a       | Mt/a      | Mt/a                               | Mt/a         | Mt/a           | Mt/a    | Mt/a                             | lower limit |
| 15_RWE_cluster_3 (all except S4)         |                 | X               | X               | X                | 80%                                            | 38.7                                      | 42.7   | 40.3      | 40.3         | 34.3      | 42.1      | 39.7    | 34.3   | 42.7   | 10%                     | 26.20      | 43.90     | 50.00                              | 36.47        | 41.41          |         | lower limit                      |             |
| 15_RWE_Frimmersdorf isolated below 450 m | X               |                 |                 |                  | 55%                                            | 1.6                                       | 2.7    | 1.3       | 1.5          | 1.4       | 1.7       | 1.7     | 1.3    | 2.7    | 41%                     |            |           | 2.25                               | 1.21         | 2.72           |         | clear small plume                |             |
| 15_RWE_Neurath old isolated below 600 m  |                 | X               |                 |                  | 57%                                            | 17.6                                      | 18.0   | 13.3      | 17.3         | 17.4      | 27.3      | 18.5    | 13.3   | 27.3   | 38%                     |            |           | 25.14                              | 29.26        | 28.40          |         | single crossing                  |             |
| 15_RWE_Niederaussem                      |                 |                 |                 | X                | 90%                                            | 26.2                                      | 26.6   | 25.8      | 26.2         | 26.1      | 22.0      | 25.5    | 22.0   | 26.6   | 9%                      | 21.50      | 23.50     | 30.96                              | 26.31        | 24.78          |         | high data density                |             |
| 23_Weisweiler                            |                 |                 |                 |                  | 100%                                           | 18.4                                      | 16.3   | 18.1      | 18.3         | 18.3      | 20.9      | 18.4    | 16.3   | 20.9   | 13%                     | 15.40      | 17.50     | 16.24                              | 27.80        | 25.40          |         | ideal single source on other day |             |

reference calculations with the most plausible parameters

average from the six variations of our method, as explained below

relative deviations from (max-min)/2

### Explanation and caption for primary data, including the comparison with the older version from 2016

This table is summarizing different methods for flux calculations, applied to different sources in the RWE cluster as measured on 15 Aug 2012.

The plume Weisweiler eight days later was included as a reference case under almost ideal conditions (good coverage perpendicular to the wind, no extrapolation; however low average wind speed of only 3.7 m/s).

Caption for the columns see in the next red frame below.

|                                |                                                                                                                                                                        |
|--------------------------------|------------------------------------------------------------------------------------------------------------------------------------------------------------------------|
| day_source and S1 to S4        | day in August 2012 and names of the sources                                                                                                                            |
| percentage measured            | contribution of layers with measurements; the rest of the fluxes is extrapolated down to the surface and up to the assumed stable layer                                |
| <b>200 x 100 fb</b>            | <b>gridding with 200 x 100 m (horizontal x vertical) with fixed background concentration; individual flux calculations at each measurement point (5 Hz)</b>            |
| flux 2                         | the same gridding and background, but, the fluxes were calculated after the gridding as wind x mass                                                                    |
| 200 x 100                      | the same gridding, but, the background concentrations were calculated as the minimum concentration per layer                                                           |
| 200 x 100 lb                   | the same as above, but this stratified background concentration was limited                                                                                            |
| 100 x 100                      | finer grid; the rest is like the reference calculation according to 200 x 100 fb                                                                                       |
| 200 x 200                      | coarser grid; the rest is like the reference calculation according to 200 x 100 fb                                                                                     |
| <b>average</b>                 | <b>the average from all the standard methods listed above (without the methods listed after the error estimates)</b>                                                   |
| minima                         | the minimum fluxes from the various methods                                                                                                                            |
| maxima                         | the maximum fluxes from the various methods                                                                                                                            |
| <b>relative error estimate</b> | <b>half of the maxima minus the minima divided by the average</b>                                                                                                      |
| Kriging                        | the local fluxes interpolated by Kriging; as can be seen from the results and even better from the fields, they are too smooth, tending to underestimate the fluxes    |
| Kriging 2                      | same as 'flux 2', but with wind and mass after Kriging. Also these results are less plausible than obtained by our standard method (see difference Kriging-Kriging2)   |
| 200 x 100 ce                   | the same gridding and background as 200 x 100 fb, but, the extrapolations to the surface and to the top were done with constant concentrations, which is extreme       |
| bulk average                   | the pointwise fluxes averaged without any interpolation, multiplied with the total cross section. <b>This is without any assumptions about the shape of the plume!</b> |
| bulk average 2                 | the flux resulting from multiplying the averaged wind with the averaged excessive mass. See the text in the paper for a statement about these bulk averages.           |

| ID       | Deriving individual source contributions from sums and differences |   |   |   |   |  |      |  |  |  |  |  |      |      |      |            |
|----------|--------------------------------------------------------------------|---|---|---|---|--|------|--|--|--|--|--|------|------|------|------------|
| <b>A</b> | Niederaussem (S1) directly measured                                |   |   |   | X |  | 26.2 |  |  |  |  |  | 25.5 | 22.0 | 26.6 | <b>9%</b>  |
| <b>B</b> | cluster 3 (all except S4)                                          |   | X | X | X |  | 38.7 |  |  |  |  |  | 39.7 | 34.3 | 42.7 | <b>10%</b> |
| <b>C</b> | Niederaussem separated in cluster 3                                |   |   |   | X |  | 27.6 |  |  |  |  |  | 23.5 | 17.8 | 32.8 | <b>32%</b> |
| <b>D</b> | Neurath old separated in cluster 3                                 |   | X |   |   |  | 16.8 |  |  |  |  |  | 16.8 | 13.3 | 20.8 | <b>22%</b> |
| <b>E</b> | Neurath new separated in cluster 3                                 |   |   | X |   |  | 7.3  |  |  |  |  |  | 7.3  | 3.9  | 11.3 | <b>50%</b> |
| <b>F</b> | Frimmersdorf separated from cluster total                          | X |   |   |   |  | 1.6  |  |  |  |  |  | 1.7  | 1.3  | 2.7  | <b>41%</b> |
| <b>G</b> | cluster total measured directly                                    | X | X | X | X |  | 53.4 |  |  |  |  |  | 51.9 | 50.0 | 55.4 | <b>5%</b>  |
| <b>H</b> | cluster 3 plus S4                                                  | X | X | X | X |  | 40.3 |  |  |  |  |  | 41.4 | 35.6 | 45.3 | <b>12%</b> |
| <b>I</b> | missed in cluster_3 (added for B to E)                             |   |   |   |   |  | 13.1 |  |  |  |  |  | 10.5 | 4.7  | 19.8 | <b>72%</b> |
| <b>J</b> | A+D+E+F                                                            | X | X | X | X |  | 51.9 |  |  |  |  |  | 51.3 | 40.6 | 61.3 | <b>20%</b> |
| <b>K</b> | (G+J)/2 and min, max for errors                                    | X | X | X | X |  | 52.6 |  |  |  |  |  | 51.6 | 50.0 | 61.3 | <b>11%</b> |

### Sums and differences, listed as cases A to K:

|          |                                                                                                                                                                                                                                                                                                                                                                                                                                                                                                                      |
|----------|----------------------------------------------------------------------------------------------------------------------------------------------------------------------------------------------------------------------------------------------------------------------------------------------------------------------------------------------------------------------------------------------------------------------------------------------------------------------------------------------------------------------|
|          | <b>A, F, G, and the sum (B = A+D+E) were directly measured.</b> For the latter (called 'cluster 3: all except S4'), the three contributions for A, D, and E were estimated graphically on the cross section (figure 8).<br>In sums and differences, the ranges were calculated using the extrema (minima or maxima). The uncertainty of the graphical separation was done by a wide variation of the assumptions (e.g. percentage overlap of the plumes 20..80 %).<br>These error estimates are rather conservative. |
|          | <b>Description and Comments to the 11 Cases:</b>                                                                                                                                                                                                                                                                                                                                                                                                                                                                     |
| <b>A</b> | direct measurement that should be quite accurate, i.e. no evident over- or underestimation. This is the most robust number in the data set. However, also here, extrapolation from 1100 m to 1300 m was necessary, adding to the overall uncertainty as presented in table 3 of the paper.                                                                                                                                                                                                                           |
| <b>B</b> | cluster 3 copied from the table of the primary measurements                                                                                                                                                                                                                                                                                                                                                                                                                                                          |
| <b>C</b> | separated graphically in the cross section 'cluster 3' (fig. 8), where the three sources C, D, and E can be seen, but, not sharply discriminated. For the error estimate, the split was varied between extreme assumptions.                                                                                                                                                                                                                                                                                          |
| <b>D</b> | See C and the graph of the cross-section (fig. 8)                                                                                                                                                                                                                                                                                                                                                                                                                                                                    |
| <b>E</b> | See C and the graph of the cross-section (fig. 8)                                                                                                                                                                                                                                                                                                                                                                                                                                                                    |
| <b>F</b> | directly measured; this is the most significant change compared to the first version of the paper.<br>Based on the information, that this source was rather weak, it was possible to see, that indeed only a small plume below 450 mAMSL was visible (fig. 7).<br>This plume is marked on the new cross-section of the total cluster, and was inspected separately in a higher resolution (100 x 100 m <sup>2</sup> )                                                                                                |
| <b>G</b> | directly measured, with a certain risk, that the top of the plume (linearly extrapolated to flux zero on 1300 mAMSL) is underestimated. It is therefore a lower limit of the flux.                                                                                                                                                                                                                                                                                                                                   |
| <b>H</b> | 'cluster 3' plus Frimmersdorf (F) is now better than before, and rather an underestimation. The underestimation can be estimated by the difference I, which was used before calculating the scenarios C, D, and E                                                                                                                                                                                                                                                                                                    |
| <b>I</b> | The difference between two methods to obtain the total emission. This difference was used to adjust G before splitting into C, D, E.                                                                                                                                                                                                                                                                                                                                                                                 |
| <b>J</b> | Checksum of the individual sources. After the adjustments explained above, this is well in agreement of the directly measured total emission of the cluster. However, the minimum and maximum has a wider range.                                                                                                                                                                                                                                                                                                     |
| <b>K</b> | Because G is clearly a lower limit of the total emission, the minimum is taken from there, and not from J. On the other hand, the maximum of J is the upper limit of the total emission.                                                                                                                                                                                                                                                                                                                             |
